# Supplementary material for: Dynamics of multiple resistance mechanisms in plasma DNA during EGFR‐targeted therapies in non‐small cell lung cancer
Source: EMBO Mol Med. 2018 May 30;10(6):e7945. doi: 10.15252/emmm.201707945 (PMC5991591; doi:10.15252/emmm.201707945)
Supplement: Supplementary file 1 — Appendix [file EMMM-10-e7945-s001.pdf]

## **Appendix**

### **Dynamics of multiple resistance mechanisms in plasma DNA during EGFR-targeted therapies in NSCLC**

Dana Wai Yi TSUI, Muhammed MURTAZA, Alvin Seng Cheong WONG, Oscar M RUEDA,  
Chris G SMITH, Dineika CHANDRANANDA, Ross A SOO, Hong Liang LIM, Boon Cher GOH,  
Carlos CALDAS, Tim FORSHEW, Davina GALE, Wei LIU, James MORRIS, Francesco  
MARASS, Tim EISEN, Tan Min CHIN, Nitzan ROSENFELD

#### **Appendix Methods**

#### **Appendix Figures S1-8**

#### **Appendix Tables S1-8**

## Appendix Methods

### Sample collection and processing

Collected blood was spun down immediately (<1 hour) at 3,000 rpm for 20 min at the National University Hospital, Singapore. The plasma fraction was frozen and sent to Cancer Research UK Cambridge Institute, UK on dry ice. Thawed plasma samples were re-centrifuged at 14,400 rpm speed for 10 min to further separate any cellular portions and the supernatant before DNA was extracted from 0.8-2 ml of plasma using the Qiagen QIAamp Circulating Nucleic Acid Kit (Qiagen) according to manufacturer's protocol, except that we re-suspended carrier RNA to 1µg/ µL. The eluted DNA was stored at -20 °C until analysis.

### Mutation identification and quantification by TAm-Seq and digital PCR

Plasma samples were analyzed by tagged-amplicon deep sequencing using the panel described previously (Forsheew et al, 2012), with the addition of an amplicon that covers exon 18 of *EGFR* with the following target-specific primer sequences: forward primer TGGTGAGGGCTGAGGTG and reverse primer CCTGTGCCAGGGACCTTAC (using adapter sequences as previously specified). Mutation data were expressed as mutant allele fractions (AF). The principle of digital PCR for DNA quantification has been described previously (Vogelstein & Kinzler, 1999; Yung et al, 2009). Assays targeting the two hot-spot mutations on exon 19 (15-bp deletion) and exon 21 (L858R codon change 2753T>G) were performed as previously described (Yung et al, 2009). A TaqMan based assay targeting the T790M (2369C>T) resistance-conferring mutation in exon 20 was designed in this study. All digital PCR analysis was carried out on the BioMark system using 12.765 Digital Arrays (Fluidigm) following manufacturer's instructions and protocol. Data was analysed as previously described, except that for hotspot mutations (i.e. L858R and T790M), mutations were identified in a sample if non-reference AFs were above the respective background distribution at a confidence margin of 0.99 or greater in both replicates, instead of the threshold of 0.9995 or greater for other mutations. Mutant allele fractions were calculated based on weighted average (based on sequencing depth) across all replicates. The code used for

analysis of sequencing data has been licensed to Invitro and is not publicly available. The MAF measured by TAM-Seq and ddPCR strongly correlate with each other (Appendix Fig S8).

Sensitivity and specificity of the assays for Ex19 deletion and L858R were previously shown (Yung et al, 2009), and was reproducible in our data (details below). The T790M assay was evaluated by testing the assays in a serial 2-fold dilution of DNA extracted from a heterozygous cell line DNA (NCI-H1975, purchased from ATCC) carrying the mutation spiked in to healthy control plasma DNA. Quantification was linear over several orders of magnitude of dilution for all three assays (Appendix Fig. S7). Sensitivity of the T790M assays was tested using a plasma sample carrying T790M mutant sequences spiked in to healthy control plasma DNA such that the mutant allele frequency ranged from 0.1% to 5% (with 1-9 copies of mutant DNA spiked in to 748-955 copies of wild-type DNA). Mutant molecules were detected down to 0.1% expected allele frequency. Root mean square error (coefficient of variation) between expected and observed mutant allele frequency was 0.07 for allele frequencies at 0.06% (Appendix Fig S2b). The specificity of digital PCR assays for Exon 19 deletion, L858R and T790M were evaluated in a large volume of pooled healthy individual plasma samples. For the Exon 19 deletion and T790M assays, no mutant allele was detected out of >10,000 wild-type DNA molecules. For L858R, 3 false positive mutant allele were detected out of ~9500 wild-type DNA molecules, giving a false positive rate of 0.03% (Appendix Table S6). Every plasma sample was also quantified by digital PCR to estimate the total DNA copy number per ml plasma using a 65-bp assay targeting a region on the *RPP30* gene, a non-amplified region in the genome (Wang et al, 2010). The levels of total DNA may be affected by sample processing and extraction efficiency, which would in turn affect the sensitivity of detecting rare mutant allele. Therefore we measure the levels of total amplifiable copies of normal DNA in every sample as a quality check. The primer and probe sequences of all the digital PCR assays are summarized in Appendix Table S7. The mutant allele fractions were calculated based on the averaged values of digital PCR assay and TAM-Seq and reported in Appendix Dataset EV1.

## Appendix Figures

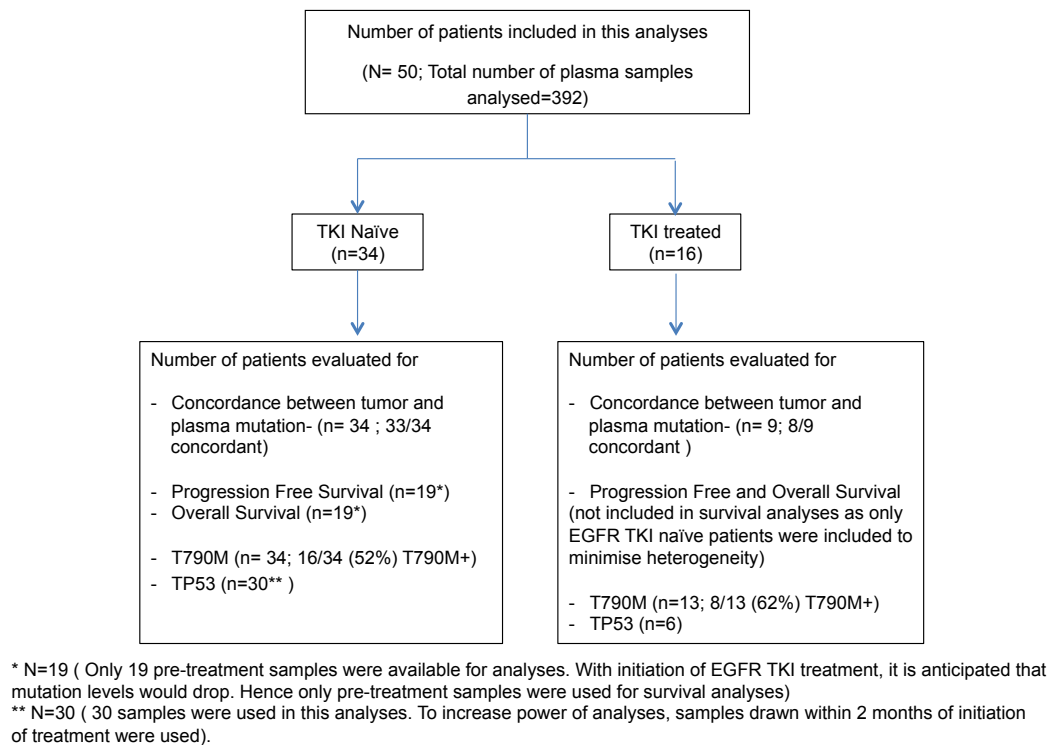

### Appendix Figure S1

**Consort diagram showing the number of patients involved in different components of the study.**

Of the 50 patients, 34 were TKI naïve and 16 were previously treated with TKI but progressed. We evaluated the concordance between tumor and plasma EGFR activating mutations and T790M status in both groups. Survival analysis was only performed in the TKI-naïve group.

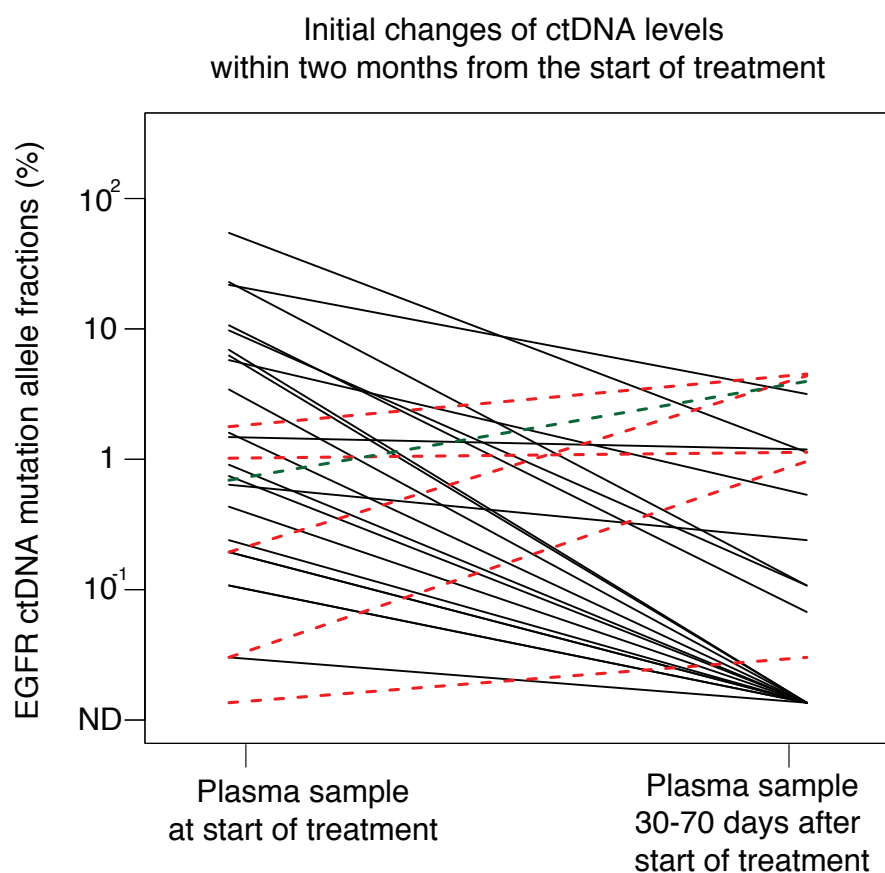

## Appendix Figure S2

### Initial changes of ctDNA levels in relation to radiographic responses

Initial change of *EGFR* mutant allele fractions in ctDNA of 26 patients where plasma samples were available before the start of treatment and at days 30-70 from start of treatment. Twenty-five patients had detectable ctDNA (non-zero) in either of the plasma samples. From these 25 patients, 24 responded to the treatment within the first 70 days, and 1 progressed. The black lines indicated a drop of ctDNA levels, red dotted lines indicated an increase for the patients who responded, and green dotted line indicated an increase for one patient who progressed, within this period of time.

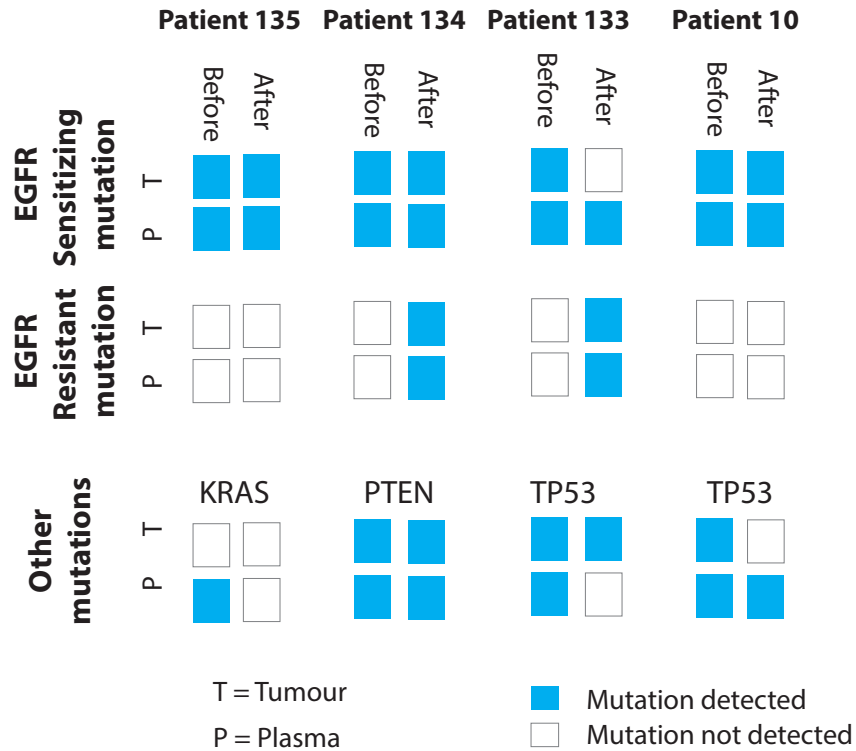

### Appendix Figure S3

#### Concordance of mutation status before and after progression to EGFR-TKI

Summary of the mutation status in 4 patients where tumour and plasma samples were available before and after progression to EGFR-TKI. Status of EGFR sensitizing mutation (either L858R or Ex19 Del) and resistance-conferring (T790M) mutations are shown. Other mutations include TP53, KRAS and PTEN. The blue squares denote samples where mutations were detected, whereas the white square denote samples where mutations were not detected, before (pre-treatment) and after (closest to the time of progression) EGFR-TKI therapy.

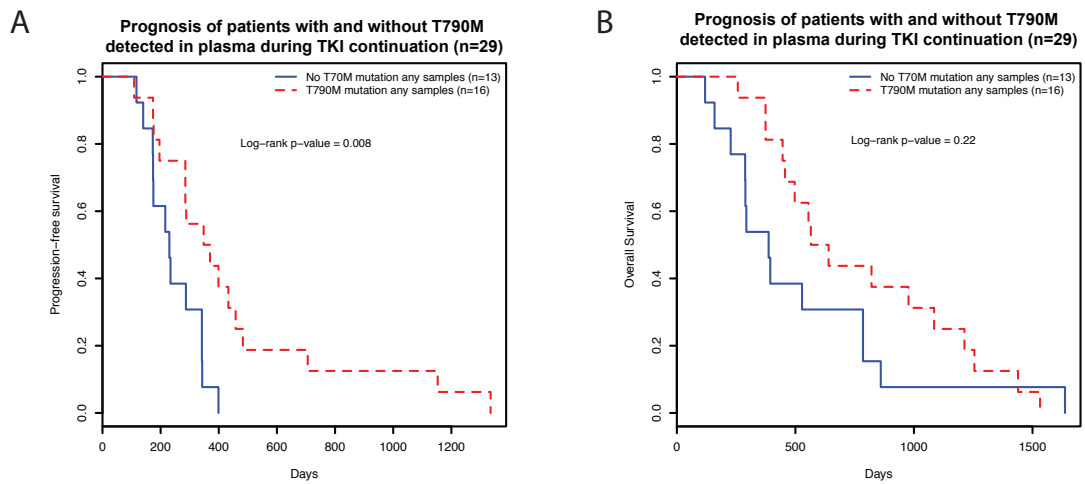

## Appendix Figure S4

### Prognostic value of the presence of T790M in plasma during TKI-continuation

(A and B) First-line TKI-treated patients that progressed with T790M detected in any of the plasma samples during TKI-continuation had significantly better progression-free survival (e, log-rank p-value = 0.008) and overall survival(log-rank p-value = 0.22), compared to patients who progressed with T790M detected in their plasma samples.

## Appendix Figure S5

### Patient 122

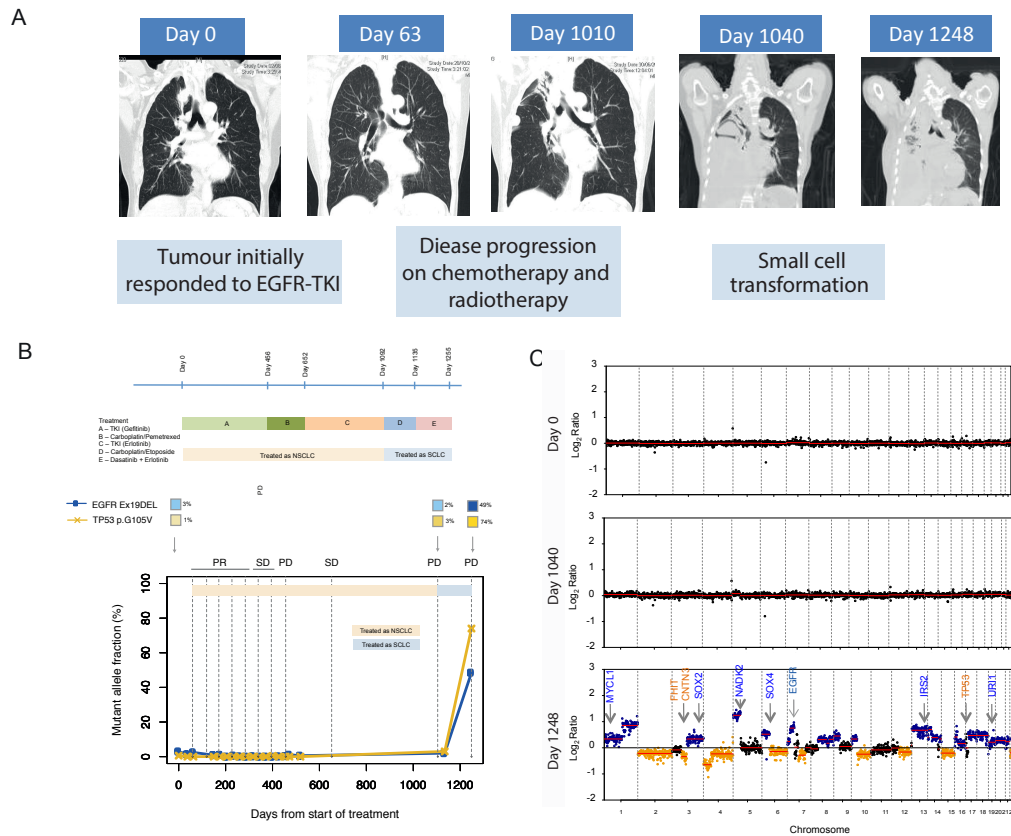

### Global copy number changes and ctDNA dynamics in patient 122 before and after histological transformation to SCLC

A) Imaging scans showing radiographic records of clinical responses and progression before and after SCLC transformation (Day 1040). B) Dynamics of somatic point mutations in longitudinal plasma samples collected during the treatment. C) Global copy number profiles in selected plasma samples collected during the treatment before and after SCLC transformation. CNV events that were significantly identified and coincide with literature-reported SCLC events are denoted in colours: blue for gain and orange for loss.

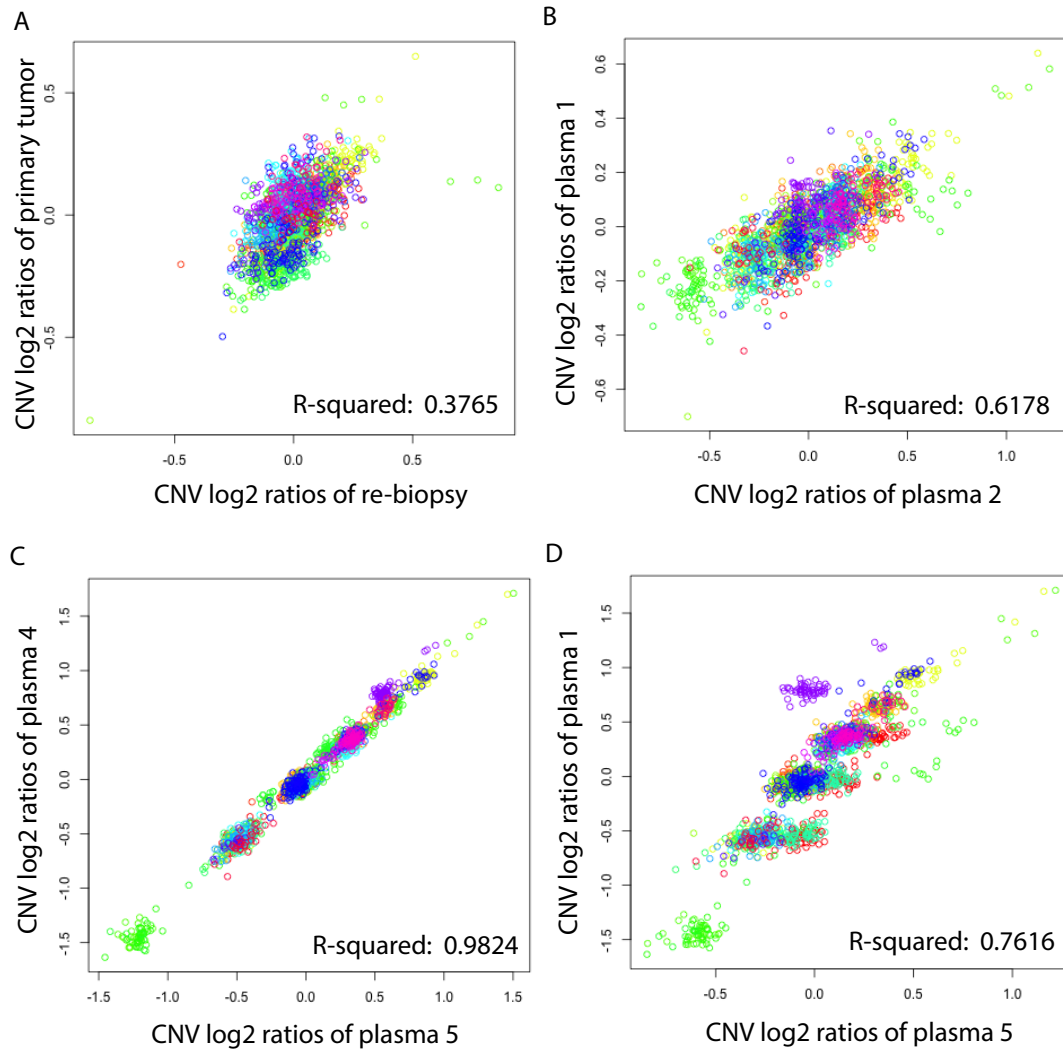

## Appendix Figure S6

**Correlation between the segmented log2 ratio of different plasma samples of patient 218.** Relationship between A) the tumour samples at baseline and relapse, B) plasma 1 (day 78) and 2 (day 329) before and after sequential treatment of chemotherapy carboplatin with alimta, then docetaxel; C) plasma 4 (day 500) and 5 (day 534), after progression on combination treatment of cisplatin and etoposide; D) before and after confirmation of SCLC transformation, between plasma 1 (day 78) and plasma 5 (day 534). The adjusted R-square for the correlation are shown.

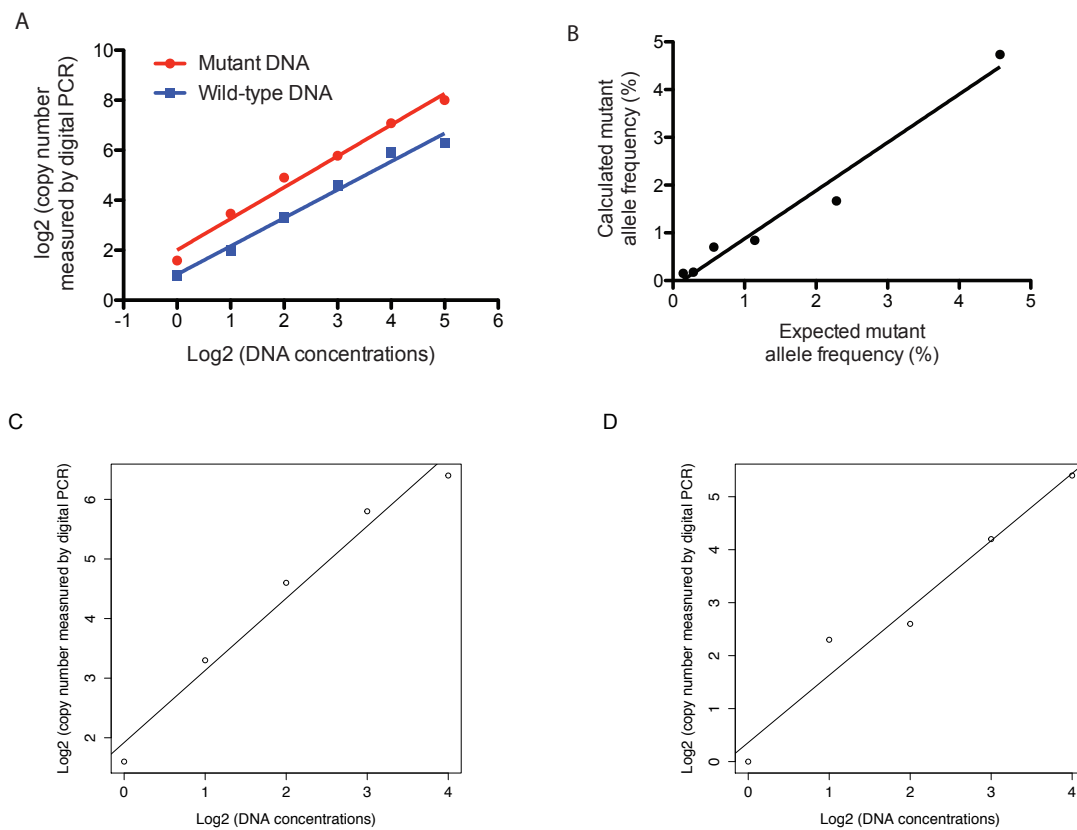

## Appendix Figure S7

### Digital PCR assays evaluation

#### A-D) Quantitative performance of digital PCR assay in serially diluted mutant and wild-type DNA

A. Quantitative performance of digital PCR analysis for T790M mutation. A serial 2-fold dilution of cell line DNA carrying a T790M mutation was prepared by dilution into water and analyzed by digital PCR. Quantification by digital PCR (log2 of copy number measured by digital PCR) was linear over >2 orders of magnitude of dilution.

B. A plasma sample carrying T790M mutant sequences was mixed with wildtype plasma DNA such that the mutant allele frequency ranged from 0.1% to 5%. (with 1-9 copies of mutant DNA spiked in to 748-955 copies of wild-type DNA). The mixtures were analyzed with digital PCR. Mutant molecules were detected down to 0.1% expected allele frequency. Root mean square

error (coefficient of variation) between expected and observed mutant allele frequency was 0.07 for allele frequencies at 0.06%.

C-D. Quantitative performance of digital PCR analysis for (C) L858R and (D) Exon 19 Deletion mutations. A serial 2-fold dilution of cell line DNA carrying the respective mutations were prepared by dilution into water and analyzed by digital PCR. Quantification by digital PCR ( $\log_2$  of copy number measured by digital PCR) was linear over >2 orders of magnitude of dilution, in agreement with the linearity of quantification of these assays previously described (Yung et al, 2009).

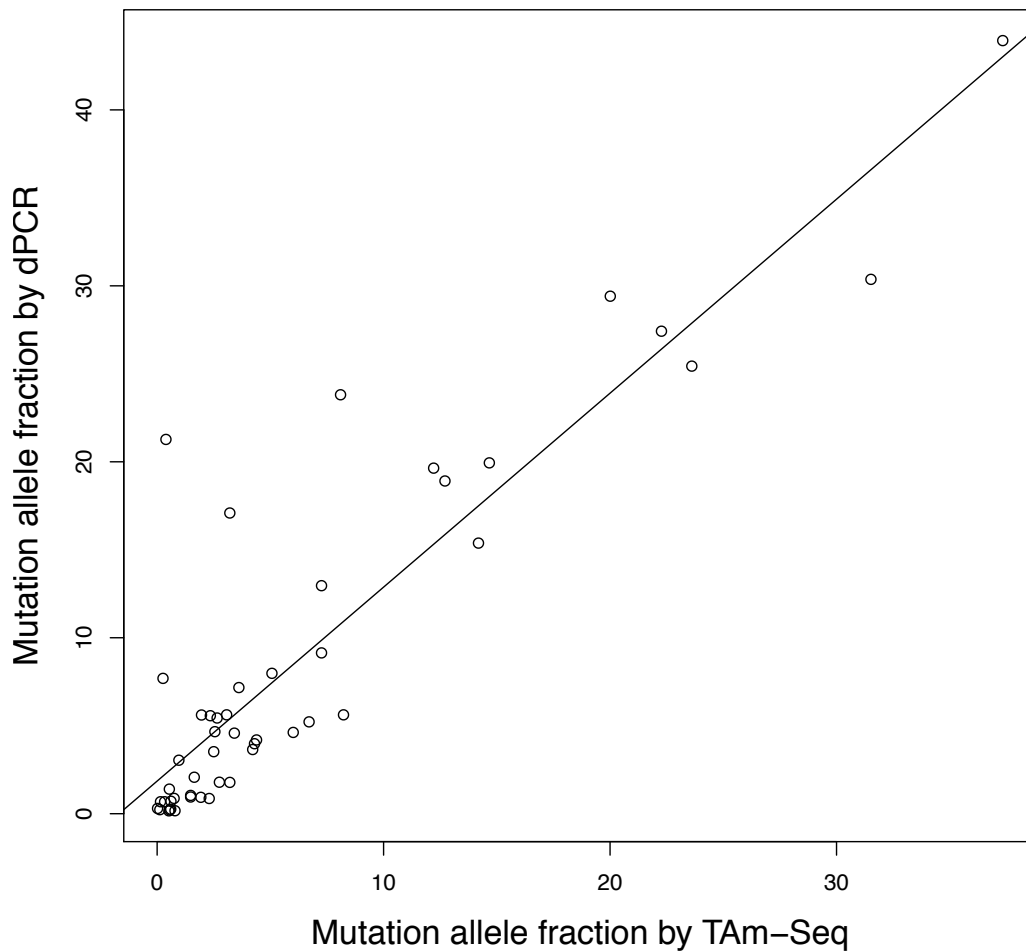

### Appendix Figure S8

#### Correlation of mutation allele fraction measured by TAM-Seq and digital PCR (dPCR)

(E) There are 49 data-points where both measurements of TAM-Seq and dPCR are non-zero. The mutation allele fractions of L858R and T790M measured by TAM-Seq and digital PCR (dPCR) are significantly correlated with each other ( $p$ -value  $< 2e-16$ ,  $R$ -squared = 0.7982). The root mean square (RMS) relative error between the two measurements was 26% for mutant allele fraction  $> 1\%$ .

## Appendix Tables:

| Patient study number                                                                                                                                                                                                                                                | EGFR detected in tumor (hospital record) |                                          |                                        | Additional EGFR mutations detected in plasma        |                                       | Other cancer mutations detected                          |                                      |                                                          |                                        |
|---------------------------------------------------------------------------------------------------------------------------------------------------------------------------------------------------------------------------------------------------------------------|------------------------------------------|------------------------------------------|----------------------------------------|-----------------------------------------------------|---------------------------------------|----------------------------------------------------------|--------------------------------------|----------------------------------------------------------|----------------------------------------|
|                                                                                                                                                                                                                                                                     | Mutation details                         | Mutant AF* in first available plasma (%) | EGFR status in tumor and plasma agreed | Mutations details                                   | Mutant AF* in first plasma (%)        | In plasma collected during treatment                     | In matched normal DNA (if available) | In pre-treatment plasma (if available)                   | In pre-treatment tumour (if available) |
| <b>TKI-naïve</b>                                                                                                                                                                                                                                                    |                                          |                                          |                                        |                                                     |                                       |                                                          |                                      |                                                          |                                        |
| 3                                                                                                                                                                                                                                                                   | ND (Wild type)                           | ND                                       | Yes                                    |                                                     | ND                                    | -                                                        |                                      | -                                                        | -                                      |
| 5                                                                                                                                                                                                                                                                   | ND (Wild type)                           | ND                                       | Yes                                    |                                                     | ND                                    | -                                                        |                                      | -                                                        | -                                      |
| 6                                                                                                                                                                                                                                                                   | Ex19 DEL del 747-E749.                   | 2.10                                     | Yes                                    |                                                     |                                       | -                                                        |                                      | -                                                        | -                                      |
| 8                                                                                                                                                                                                                                                                   | Ex19 DEL del E746-A750                   | 0.54                                     | Yes                                    |                                                     |                                       | -                                                        |                                      | -                                                        | -                                      |
| 10                                                                                                                                                                                                                                                                  | p.L858R                                  | 1.99                                     | Yes                                    | p.L1038V<br>p.V738F                                 | 53.70<br>49.66                        | TP53 p.E258K                                             | ND                                   | Yes                                                      | Yes                                    |
| 12                                                                                                                                                                                                                                                                  | p.L858R                                  | 0.92                                     | Yes                                    |                                                     |                                       | TP53 p.R267W                                             | ND                                   | Yes                                                      | Yes                                    |
| 101                                                                                                                                                                                                                                                                 | Ex19 DEL del L747-A750insP               | 0.28                                     | Yes                                    | p.A864T                                             | ND <sup>a</sup>                       | -                                                        |                                      | -                                                        | -                                      |
| 103                                                                                                                                                                                                                                                                 | Ex19 DEL del L747-E749, A750P            | 2.51                                     | Yes                                    |                                                     |                                       | -                                                        |                                      | -                                                        | -                                      |
| 104                                                                                                                                                                                                                                                                 | p.G719S                                  | 10.20                                    | Yes                                    |                                                     |                                       | BRAF p.G593V                                             | ND                                   | NA                                                       | ND                                     |
|                                                                                                                                                                                                                                                                     |                                          |                                          |                                        | p.N700T<br>p.Q701K<br>p.A698D<br>p.L861Q<br>p.L858R | 2.30<br>2.00<br>0.80<br>13.90<br>0.05 |                                                          |                                      |                                                          |                                        |
| 105                                                                                                                                                                                                                                                                 | Ex19 DEL del E746-A750                   | 4.34                                     | Yes                                    |                                                     |                                       | -                                                        |                                      | -                                                        | -                                      |
| 106                                                                                                                                                                                                                                                                 | p.L858R                                  | ND <sup>a</sup>                          | Yes                                    |                                                     |                                       | TP53 p.P223A, PIK3CA p.E545A                             | ND                                   | Yes, Yes                                                 | ND, ND                                 |
| 107                                                                                                                                                                                                                                                                 | Ex19 DEL K745-E746insIPVAIK              | 0.06                                     | Yes                                    | p.A767P                                             | ND <sup>a</sup>                       | TP53 p.C176F, PIK3CA p.E545A                             | ND                                   | NA                                                       | Yes, ND                                |
| 108                                                                                                                                                                                                                                                                 | p.L858R                                  | 23.81                                    | Yes                                    |                                                     |                                       | TP53 p.S241C                                             | ND                                   | Yes                                                      | NA                                     |
| 109                                                                                                                                                                                                                                                                 | p.L858R                                  | 30.37                                    | Yes                                    |                                                     |                                       | TP53 chr17:7578176 C>A                                   | ND                                   | Yes                                                      | NA                                     |
| 112                                                                                                                                                                                                                                                                 | p.L858R                                  | 0.07                                     | Yes                                    |                                                     |                                       | -                                                        |                                      | -                                                        | -                                      |
| 113                                                                                                                                                                                                                                                                 | Ex19 DEL del E746-A750                   | 3.07                                     | Yes                                    | p.D994E                                             | ND <sup>a</sup>                       | BRAF p.G593V, PIK3CA p.T1061K, TP53 p.Y103X              | ND                                   | NA                                                       | NA                                     |
| 115                                                                                                                                                                                                                                                                 | p.L858R                                  | 15.38                                    | Yes                                    |                                                     |                                       | -                                                        |                                      | -                                                        | -                                      |
| 116                                                                                                                                                                                                                                                                 | Ex19 DEL del E746-A750                   | 3.39                                     | Yes                                    |                                                     |                                       | -                                                        |                                      | -                                                        | -                                      |
|                                                                                                                                                                                                                                                                     |                                          |                                          |                                        | p.L858R                                             | 0.68                                  |                                                          |                                      |                                                          |                                        |
| 117                                                                                                                                                                                                                                                                 | Ex19 DEL del E746-T751                   | 65.65                                    | Yes                                    |                                                     |                                       | TP53 p.R248Q, PIK3CA p.T1061K                            | ND                                   | Yes, ND                                                  | Yes, ND                                |
| 119                                                                                                                                                                                                                                                                 | Ex19 DEL del E746-A750                   | 0.64                                     | Yes                                    |                                                     |                                       | -                                                        |                                      | -                                                        | -                                      |
| 120                                                                                                                                                                                                                                                                 | p.L858R                                  | 12.96                                    | Yes                                    |                                                     |                                       | TP53 p.H179R                                             | ND                                   | Yes                                                      | NA                                     |
|                                                                                                                                                                                                                                                                     |                                          |                                          |                                        | Ex19 DEL                                            | 0.20                                  |                                                          |                                      |                                                          |                                        |
| 122                                                                                                                                                                                                                                                                 | Ex19 DEL del E746-A750                   | 2.94                                     | Yes                                    |                                                     |                                       | TP53 p.G105V                                             | ND                                   | Yes                                                      | Yes                                    |
| 123                                                                                                                                                                                                                                                                 | Ex19 DEL del T751-I759                   | 0.27                                     | Yes                                    |                                                     |                                       | PIK3CA p.T1052K                                          | ND                                   | Yes                                                      | ND                                     |
| 124                                                                                                                                                                                                                                                                 | p.L858R                                  | 1.01                                     | Yes                                    |                                                     |                                       | TP53 p.L257R                                             | ND                                   | Yes                                                      | NA                                     |
|                                                                                                                                                                                                                                                                     |                                          |                                          |                                        | Ex19 DEL                                            | 0.15                                  |                                                          |                                      |                                                          |                                        |
| 125                                                                                                                                                                                                                                                                 | p.L858R                                  | 5.22                                     | Yes                                    |                                                     |                                       | TP53 p.P152L                                             | ND                                   | Yes                                                      | Yes                                    |
| 126                                                                                                                                                                                                                                                                 | Ex19 DEL del 746-A750                    | ND <sup>a</sup>                          | Yes                                    |                                                     |                                       | PTEN p.V317G                                             | ND                                   | NA                                                       | ND                                     |
| 127                                                                                                                                                                                                                                                                 | Ex19 DEL del 746-A750                    | 10.96                                    | Yes                                    |                                                     |                                       | TP53 p.P87L, TP53 p.Q331X, TP53 p.Y220C                  | ND                                   | Yes, Yes, Yes                                            | ND, Yes Yes                            |
| 128                                                                                                                                                                                                                                                                 | Ex19 DEL del 746-A750                    | 0.17                                     | Yes                                    |                                                     |                                       | -                                                        |                                      | -                                                        | -                                      |
| 129                                                                                                                                                                                                                                                                 | Ex19 DEL del 746-A750                    | 0.30                                     | Yes                                    |                                                     |                                       | PTEN p.D92H                                              | ND                                   | ND <sup>a</sup>                                          | Yes                                    |
| 130                                                                                                                                                                                                                                                                 | p.L858R                                  | 2.75                                     | Yes                                    |                                                     |                                       | TP53 p.I195T                                             | ND                                   | Yes                                                      | Yes                                    |
| 131                                                                                                                                                                                                                                                                 | G719S (hospital record)/p.L861Q          | ND/1.00                                  | No                                     |                                                     |                                       | TP53 p.P87T, TP53 p.R342X                                | ND                                   | NA, NA                                                   | ND, Yes                                |
| 133                                                                                                                                                                                                                                                                 | Ex19 DEL del L747-P753insS               | ND                                       | No                                     |                                                     |                                       | TP53 p.Q331X                                             | ND                                   | Yes                                                      | Yes                                    |
|                                                                                                                                                                                                                                                                     |                                          |                                          |                                        | p.L858R                                             | 0.28                                  |                                                          |                                      |                                                          |                                        |
| 134                                                                                                                                                                                                                                                                 | p.L858R                                  | 1.56                                     | Yes                                    |                                                     |                                       | PTEN p.Q171X                                             | ND                                   | Yes                                                      | Yes                                    |
| 135                                                                                                                                                                                                                                                                 | 264delTTAAGAGAAGCAACATCTCC               | ND <sup>a</sup>                          | Yes                                    | p.L858R                                             | 0.17                                  | KRAS p.G12A, KRAS p.G13D                                 | ND                                   | NA                                                       | ND, ND                                 |
| <b>TKI-treated</b>                                                                                                                                                                                                                                                  |                                          |                                          |                                        |                                                     |                                       |                                                          |                                      |                                                          |                                        |
| 11                                                                                                                                                                                                                                                                  | Ex19 DEL del 746-A750                    | 29.65                                    | Yes                                    |                                                     |                                       | PTEN p.S227F, TP53 p.R248Q, TP53 p.P87T, PIK3CA p.H1060Q | ND                                   | ND <sup>a</sup> , Yes, ND <sup>a</sup> , ND <sup>a</sup> | NA                                     |
| 201                                                                                                                                                                                                                                                                 | NA <sup>b</sup>                          | -                                        |                                        | Ex19 DEL<br>p.L858R                                 | 1.87<br>0.13                          | -                                                        |                                      | -                                                        | -                                      |
| 202                                                                                                                                                                                                                                                                 | p.L858R                                  | 27.42                                    | Yes                                    |                                                     |                                       | TP53 p.R273H, TP53 p.T253P                               | ND                                   | NA                                                       | NA                                     |
| 203                                                                                                                                                                                                                                                                 | p.G719A                                  | ND <sup>a</sup>                          | Yes                                    | p.T783P                                             | 0.72                                  | -                                                        |                                      | -                                                        | -                                      |
| 204                                                                                                                                                                                                                                                                 | NA                                       | -                                        |                                        | p.L858R<br>p.A767P<br>p.L858R                       | 25.44<br>22.30<br>21.27               | -                                                        |                                      | -                                                        | -                                      |
| 205                                                                                                                                                                                                                                                                 | NA                                       | -                                        |                                        |                                                     |                                       | -                                                        |                                      | -                                                        | -                                      |
| 206                                                                                                                                                                                                                                                                 | p.L858R                                  | 4.94                                     | Yes                                    |                                                     |                                       | -                                                        |                                      | -                                                        | -                                      |
| 207                                                                                                                                                                                                                                                                 | Ex19 DEL                                 | 0.28                                     | Yes                                    |                                                     |                                       | -                                                        |                                      | -                                                        | -                                      |
| 208                                                                                                                                                                                                                                                                 | NA                                       | -                                        |                                        | Ex19 DEL                                            | 3.01                                  | TP53 p.P87T, TP53 p.P177L, TP53 p.P72S                   | ND                                   | NA                                                       | NA                                     |
| 209                                                                                                                                                                                                                                                                 | NA                                       | -                                        |                                        | Ex19 DEL                                            | 9.38                                  | TP53 p.Y163C                                             | ND                                   | NA                                                       | NA                                     |
| 210                                                                                                                                                                                                                                                                 | Ex19 DEL del 746-A750                    | 0.06                                     | Yes                                    |                                                     |                                       | -                                                        |                                      | -                                                        | -                                      |
| 211                                                                                                                                                                                                                                                                 | NA                                       | -                                        |                                        | Ex19 DEL                                            | 1.45                                  | -                                                        |                                      | -                                                        | -                                      |
| 212                                                                                                                                                                                                                                                                 | NA                                       | -                                        |                                        | Ex19 DEL                                            | 2.11                                  | -                                                        |                                      | -                                                        | -                                      |
| 223                                                                                                                                                                                                                                                                 | Ex19 DEL del 746-A750                    | -                                        |                                        |                                                     |                                       | TP53 p.G154S, PIK3CA p.E545K                             | ND                                   | Yes                                                      | NA                                     |
| 220                                                                                                                                                                                                                                                                 | Ex19 DEL del E746-A750                   | ND <sup>a</sup>                          | Yes                                    |                                                     |                                       | TP53 p.Y103X                                             | ND                                   | Yes                                                      | NA                                     |
| 218                                                                                                                                                                                                                                                                 | L858R                                    | 0.3                                      | Yes                                    |                                                     |                                       | TP53 p.R175H, TP53 p.A307A                               | ND                                   | Yes                                                      | Yes                                    |
| <sup>a</sup> Detected in follow up samples<br><sup>*</sup> AF = Allele Fraction<br>NA = Materials not available<br>NA <sup>b</sup> = Patients enrolled into the trial based on the criteria that they had progressed on previous TKI treatment<br>ND = Not Detected |                                          |                                          |                                        |                                                     |                                       |                                                          |                                      |                                                          |                                        |

**Appendix Table S1. Mutation profiles of the 47 patients**

Table summarizing the mutation profiles of the 47 patients. The EGFR mutations status in tumor was obtained based on hospital record or TAM-Seq/digital PCR analysis if tumor materials were available. The status of the tumor mutations in the first available plasma was shown with the mutant allele fractions (AF) indicated in percentage (%), or ND (not detected), and mutations that were detected in subsequent follow-up plasma were indicated with ND<sup>^</sup>. Additional *EGFR* mutations detected in plasma during treatment and their AF in first available plasma were also summarized. Mutations other than *EGFR* that were detected during treatment were listed, with indication of whether they were detected in matched normal DNA, pre-treatment plasma, or pre-treatment tumor, if available respectively.

| Patient study number | First CT scan results on 60 days | First available plasma sample |                             | Plasma sample collected after 30-70 days |                             |
|----------------------|----------------------------------|-------------------------------|-----------------------------|------------------------------------------|-----------------------------|
|                      |                                  | Days from start of treatment  | EGFR ctDNA levels (AF in %) | Days from start of treatment             | EGFR ctDNA levels (AF in %) |
| 117                  | SD                               | -1                            | 65.7                        | 35                                       | 2.3                         |
| 109                  | PR                               | 0                             | 31.0                        | 63                                       | 0.3                         |
| 11                   | SD                               | -5                            | 29.7                        | 61                                       | 5.6                         |
| 108                  | PR                               | 0                             | 16.0                        | 66                                       | 0.2                         |
| 115                  | PR                               | 0                             | 14.8                        | 63                                       | 0.3                         |
| 127                  | PR                               | 0                             | 11.0                        | 63                                       | 0.0                         |
| 120                  | PR                               | 0                             | 10.1                        | 63                                       | 0.0                         |
| 209                  | SD                               | 7                             | 9.4                         | 60                                       | 1.2                         |
| 125                  | PR                               | 0                             | 6.0                         | 34                                       | 0.0                         |
| 116                  | PR                               | -1                            | 3.4                         | 63                                       | 7.6                         |
| 113                  | SD                               | 6                             | 3.1                         | 68                                       | 0.0                         |
| 122                  | PR                               | 0                             | 2.9                         | 63                                       | 2.4                         |
| 6                    | CR                               | -2                            | 2.1                         | 62                                       | 2.3                         |
| 201                  | SD                               | -5                            | 1.9                         | 67                                       | 0.0                         |
| 134                  | PR                               | 0                             | 1.6                         | 64                                       | 0.0                         |
| 211                  | PD                               | 0                             | 1.5                         | 35                                       | 6.8                         |
| 130                  | PR                               | 0                             | 1.4                         | 63                                       | 0.6                         |
| 10                   | PR                               | -7                            | 1.0                         | 63                                       | 0.0                         |
| 119                  | PR                               | 0                             | 0.6                         | 63                                       | 0.0                         |
| 8                    | PR                               | -12                           | 0.5                         | 70                                       | 7.4                         |
| 124                  | PR                               | 0                             | 0.5                         | 56                                       | 0.0                         |
| 12                   | PR                               | -18                           | 0.5                         | 63                                       | 0.0                         |
| 129                  | SD                               | 0                             | 0.3                         | 62                                       | 0.0                         |
| 123                  | SD                               | 0                             | 0.3                         | 62                                       | 0.0                         |
| 133                  | PR                               | 0                             | 0.1                         | 64                                       | 0.0                         |
| 210                  | SD                               | 0                             | 0.1                         | 63                                       | 2.0                         |
| 106                  | SD                               | 0                             | 0.0                         | 66                                       | 0.1                         |
| 131                  | PR                               | 7                             | 0.0                         | 70                                       | 0.0                         |
| 101                  | SD                               | 33                            | -                           | 89                                       | -                           |
| 103                  | PR                               | 21                            | -                           | 49                                       | -                           |
| 104                  | PR                               | 35                            | -                           | 35                                       | -                           |
| 105                  | SD                               | 68                            | -                           | 68                                       | -                           |
| 107                  | PR                               | 34                            | -                           | 64                                       | -                           |
| 112                  | SD                               | 35                            | -                           | 35                                       | -                           |
| 126                  | SD                               | 33                            | -                           | 90                                       | -                           |
| 128                  | PR                               | 35                            | -                           | 63                                       | -                           |
| 135                  | PR                               | 35                            | -                           | 63                                       | -                           |
| 202                  | SD                               | 29                            | -                           | 62                                       | -                           |
| 203                  | SD                               | 36                            | -                           | 64                                       | -                           |
| 204                  | PD                               | 0                             | -                           | 0                                        | -                           |
| 205                  | PD                               | 34                            | -                           | 34                                       | -                           |
| 206                  | SD                               | 41                            | -                           | 41                                       | -                           |
| 207                  | PD                               | 61                            | -                           | 61                                       | -                           |
| 208                  | PD                               | 10                            | -                           | 10                                       | -                           |
| 212                  | SD                               | 34                            | -                           | 60                                       | -                           |
| 223                  | SD                               | 0                             | -                           | 354                                      | -                           |

**Appendix Table S2. Initial changes of EGFR ctDNA levels and clinical response**

Table summarizing the initial responses (represented by CT scan results) of the 45 patients who harbour EGFR activating mutations, the collection days (from start of treatment) of their first available plasma and samples collected after 30-70 days (closest to the date when initial CT scan results). The *EGFR* ctDNA levels of each sample were shown, for 28 patients where the first available plasma samples were collected within 7 days of start of treatment, and there was a sample within 30-70 days from start of treatment. CT scan results were represented by SD, stable disease, PR, partial response, CR, complete response, PD, progressive disease.

| Patient study number | Sample                | Date from start of sample collection / start of treatment | CT data    | EGFR activating mutation allele fraction % | EGFR resistance-conferring mutation (T790M) allele fraction % | Additional mutation (1) | Protein change (1) | Mutation details (1) | Mutant allele fraction % (1) | Additional mutation (2) | Protein change (2) | Mutation details (2) | Mutant allele fraction % (2) |
|----------------------|-----------------------|-----------------------------------------------------------|------------|--------------------------------------------|---------------------------------------------------------------|-------------------------|--------------------|----------------------|------------------------------|-------------------------|--------------------|----------------------|------------------------------|
| 10                   | Pre-treatment tumour  |                                                           |            | L858R                                      | 39.00                                                         | T790M                   | 0.00               | TP53                 | p.E258K                      | 17:7577509_C>T          |                    |                      | 60.40                        |
| 10                   | Plasma 1              | -7                                                        |            | L858R                                      | 1.99                                                          | T790M                   | 0.00               | TP53                 | p.E258K                      | 17:7577509_C>T          |                    |                      | 0.42                         |
| 10                   | Plasma 2              | 35                                                        |            | L858R                                      | 0.00                                                          | T790M                   | NA                 | TP53                 | p.E258K                      | 17:7577509_C>T          |                    |                      | 0.00                         |
| 10                   | Plasma 3              | 63                                                        | PR         | L858R                                      | 0.00                                                          | T790M                   | NA                 | TP53                 | p.E258K                      | 17:7577509_C>T          |                    |                      | 0.00                         |
| 10                   | Plasma 4              | 118                                                       |            | L858R                                      | 0.82                                                          | T790M                   | NA                 | TP53                 | p.E258K                      | 17:7577509_C>T          |                    |                      | 0.00                         |
| 10                   | Plasma 5              | 146                                                       |            | L858R                                      | 0.69                                                          | T790M                   | 0.00               | TP53                 | p.E258K                      | 17:7577509_C>T          |                    |                      | 1.95                         |
| 10                   | Plasma 6              | 174                                                       | PD         | L858R                                      | 1.40                                                          | T790M                   | 0.00               | TP53                 | p.E258K                      | 17:7577509_C>T          |                    |                      | 1.35                         |
| 10                   | Post-treatment tumour |                                                           |            | L858R                                      | 3.40                                                          | T790M                   | 0.00               | TP53                 | p.E258K                      | 17:7577509_C>T          |                    |                      | 0.00                         |
| 133                  | Pre-treatment tumour  |                                                           |            | L858R                                      | 2.56                                                          | T790M                   | 0.00               | TP53                 | p.Q331X                      | 17:7576855_G>A          |                    |                      | 8.30                         |
| 133                  | Plasma 1              | 0                                                         |            | L858R                                      | 0.28                                                          | T790M                   | 0.00               | TP53                 | p.Q331X                      | 17:7576855_G>A          |                    |                      | 2.34                         |
| 133                  | Plasma 2              | 36                                                        |            | L858R                                      | 0.00                                                          | T790M                   | 0.00               | TP53                 | p.Q331X                      | 17:7576855_G>A          |                    |                      | 0.00                         |
| 133                  | Plasma 3              | 64                                                        | PR         | L858R                                      | 0.00                                                          | T790M                   | 0.00               | TP53                 | p.Q331X                      | 17:7576855_G>A          |                    |                      | 0.00                         |
| 133                  | Plasma 4              | 90                                                        |            | L858R                                      | 0.00                                                          | T790M                   | 0.81               | TP53                 | p.Q331X                      | 17:7576855_G>A          |                    |                      | 0.00                         |
| 133                  | Plasma 5              | 111                                                       | PD         | L858R                                      | 4.00                                                          | T790M                   | 0.39               | TP53                 | p.Q331X                      | 17:7576855_G>A          |                    |                      | 0.00                         |
| 133                  | Post-treatment tumour |                                                           |            | L858R                                      | 0.00                                                          | T790M                   | 5.60               | TP53                 | p.Q331X                      | 17:7576855_G>A          |                    |                      | 11.70                        |
| 134                  | Pre-treatment tumour  |                                                           |            | L858R                                      | 36.40                                                         | T790M                   | 0.00               | PTEN                 | p.Q171X                      | 10:89711893_C>T         |                    |                      | 77.75                        |
| 134                  | Plasma 1              | 0                                                         |            | L858R                                      | 1.56                                                          | T790M                   | 0.00               | PTEN                 | p.Q171X                      | 10:89711893_C>T         |                    |                      | 2.34                         |
| 134                  | Plasma 2              | 36                                                        |            | L858R                                      | 0                                                             | T790M                   | 0.00               | PTEN                 | p.Q171X                      | 10:89711893_C>T         |                    |                      | 0.19                         |
| 134                  | Plasma 3              | 64                                                        | PR         | L858R                                      | 0                                                             | T790M                   | 0.00               | PTEN                 | p.Q171X                      | 10:89711893_C>T         |                    |                      | 0.69                         |
| 134                  | Plasma 4              | 92                                                        |            | L858R                                      | 2.5                                                           | T790M                   | 0.29               | PTEN                 | p.Q171X                      | 10:89711893_C>T         |                    |                      | 0.00                         |
| 134                  | Plasma 5              | 117                                                       |            | L858R                                      | 0.22                                                          | T790M                   | 0.34               | PTEN                 | p.Q171X                      | 10:89711893_C>T         |                    |                      | 1.06                         |
| 134                  | Plasma 6              | 148                                                       |            | L858R                                      | 0                                                             | T790M                   | 0.42               | PTEN                 | p.Q171X                      | 10:89711893_C>T         |                    |                      | 0.70                         |
| 134                  | Plasma 7              | 176                                                       | PD         | L858R                                      | 0                                                             | T790M                   | 0.18               | PTEN                 | p.Q171X                      | 10:89711893_C>T         |                    |                      | 0.49                         |
| 134                  | Plasma 8              | 211                                                       |            | L858R                                      | 2.74                                                          | T790M                   | 0.25               | PTEN                 | p.Q171X                      | 10:89711893_C>T         |                    |                      | 3.30                         |
| 134                  | Plasma 9              | 239                                                       |            | L858R                                      | 0.5                                                           | T790M                   | 0.00               | PTEN                 | p.Q171X                      | 10:89711893_C>T         |                    |                      | 1.34                         |
| 134                  | Post-treatment tumour |                                                           |            | L858R                                      | 23.80                                                         | T790M                   | 7.49               | PTEN                 | p.Q171X                      | 10:89711893_C>T         |                    |                      | 41.30                        |
| 134                  | Plasma 10             | 260                                                       |            | L858R                                      | 0                                                             | T790M                   | 0.00               | PTEN                 | p.Q171X                      | 10:89711893_C>T         |                    |                      | 0.44                         |
| 135                  | Pre-treatment tumour  |                                                           |            | Ex19 Del                                   | 50.00                                                         | T790M                   | 0.00               | KRAS                 | p.G13D                       | 12:25398281_C>T         | 0.00               | KRAS                 | p.G12A 12:25398284_C>G 0.00  |
| 135                  | Plasma 1              | 35                                                        |            | Ex19 Del                                   | 0.00                                                          | T790M                   | 0.00               | KRAS                 | p.G13D                       | 12:25398281_C>T         | 1.15               | KRAS                 | p.G12A 12:25398284_C>G 1.40  |
| 135                  | Plasma 2              | 63                                                        | PR         | Ex19 Del                                   | 0.59                                                          | T790M                   | 0.00               | KRAS                 | p.G13D                       | 12:25398281_C>T         | 0.00               | KRAS                 | p.G12A 12:25398284_C>G 0.00  |
| 135                  | Plasma 3              | 91                                                        |            | Ex19 Del                                   | 0.52                                                          | T790M                   | 0.00               | KRAS                 | p.G13D                       | 12:25398281_C>T         | 0.28               | KRAS                 | p.G12A 12:25398284_C>G 0.00  |
| 135                  | Plasma 4              | 121                                                       | PD day 175 | Ex19 Del                                   | 1.39                                                          | T790M                   | 0.00               | KRAS                 | p.G13D                       | 12:25398281_C>T         | 0.00               | KRAS                 | p.G12A 12:25398284_C>G 0.00  |
| 135                  | Post-treatment tumour |                                                           |            | Ex19 Del                                   | 66.70                                                         | T790M                   | 0.00               | KRAS                 | p.G13D                       | 12:25398281_C>T         | 0.00               | KRAS                 | p.G12A 12:25398284_C>G 0.00  |

### Appendix Table S3. Mutation profiles in 4 patients with pre- and post-treatment tumor and plasma samples

Mutation data of 4 patients with pre- and post-treatment tumor and plasma samples are shown. Data are shown according to the days from start of treatment. Radiographic responses were assessed by CT imaging. PR: partial responses; PD: Progressive disease.

| Patient study number | Day from start of treatment when first plasma sample taken | Time to events in days (progression)‡ | Time to events in days (Survival)‡ | First plasma sample EGFR activating mutation allele fraction % | First plasma sample EGFR activating mutation copies/ml | First plasma sample most abundant mutation allele fraction % | First plasma sample most abundant mutation copies/ml | Classification of mutation titres | Tumor measurement via RECIST (mm) | Median tumor volume of respective groups | Presence of extra-thoracic disease in addition to intra-thoracic disease |
|----------------------|------------------------------------------------------------|---------------------------------------|------------------------------------|----------------------------------------------------------------|--------------------------------------------------------|--------------------------------------------------------------|------------------------------------------------------|-----------------------------------|-----------------------------------|------------------------------------------|--------------------------------------------------------------------------|
| 109                  | 0                                                          | 202                                   | 374                                | 30.4                                                           | 4588.6                                                 | 30.4                                                         | 4588.6                                               | High                              | 80                                | 80                                       | No                                                                       |
| 115                  | 0                                                          | 175                                   | 304                                | 15.4                                                           | 83.5                                                   | 15.4                                                         | 83.5                                                 | High                              | 38                                |                                          | Yes                                                                      |
| 120                  | 0                                                          | 275                                   | (275)                              | 13.0                                                           | 662.1                                                  | 13.0                                                         | 662.1                                                | High                              | 66                                |                                          | No                                                                       |
| 125                  | 0                                                          | 433                                   | (433)                              | 5.2                                                            | 200.5                                                  | 5.2                                                          | 200.5                                                | High                              | 81                                |                                          | No                                                                       |
| 127                  | 0                                                          | 174                                   | (174)                              | 11.0                                                           | 1362.1                                                 | 11.0                                                         | 1362.1                                               | High                              | 93                                |                                          | No                                                                       |
| 6                    | 2 days before start of treatment                           | 427                                   | 785                                | 2.1                                                            | 53.3                                                   | 2.1                                                          | 53.3                                                 | Intermediate                      | 42                                | 42                                       | No                                                                       |
| 10                   | 7 days before start of treatment                           | 174                                   | 293                                | 2.0                                                            | 62.4                                                   | 2.0                                                          | 62.4                                                 | Intermediate                      | 25                                |                                          | No                                                                       |
| 12                   | 18 days before start of treatment                          | 399                                   | 565                                | 0.9                                                            | 128.6                                                  | 0.9                                                          | 128.6                                                | Intermediate                      | 42                                |                                          | No                                                                       |
| 116                  | 1 day before start of treatment                            | 289                                   | 399                                | 3.4                                                            | 66.3                                                   | 3.4                                                          | 66.3                                                 | Intermediate                      | 53                                |                                          | No                                                                       |
| 119                  | 0                                                          | 284                                   | 397                                | 0.6                                                            | 90.7                                                   | 0.6                                                          | 90.7                                                 | Intermediate                      | 15                                |                                          | No                                                                       |
| 122                  | 0                                                          | 458                                   | (519)                              | 2.9                                                            | 350.4                                                  | 2.9                                                          | 350.4                                                | Intermediate                      | 49                                |                                          | No                                                                       |
| 124                  | 0                                                          | 216                                   | 300                                | 1.0                                                            | 51.6                                                   | 8.5                                                          | 434.3                                                | Intermediate                      | 54                                |                                          | Yes                                                                      |
| 130                  | 0                                                          | 233                                   | (301)                              | 2.8                                                            | 104.6                                                  | 6.4                                                          | 243.5                                                | Intermediate                      | 31                                |                                          | No                                                                       |
| 134                  | 0                                                          | 176                                   | (211)                              | 1.6                                                            | 77.8                                                   | 2.2                                                          | 110.0                                                | Intermediate                      | 23                                |                                          | No                                                                       |
| 8                    | 12 days before start of treatment                          | 706                                   | (706)                              | 0.5                                                            | 38.9                                                   | 0.5                                                          | 38.9                                                 | Low                               | 45                                | 17                                       | No                                                                       |
| 106                  | 0                                                          | 846                                   | (846)                              | 0.0                                                            | 0.0                                                    | 9.8                                                          | 1803.8                                               | Low                               | 54                                |                                          | No                                                                       |
| 123                  | 0                                                          | 230                                   | (230)                              | 0.3                                                            | 12.5                                                   | 2.0                                                          | 92.8                                                 | Low                               | 17                                |                                          | No                                                                       |
| 129                  | 0                                                          | (1042)                                | (1042)                             | 0.3                                                            | 6.3                                                    | 0.3                                                          | 6.3                                                  | Low                               | 15                                |                                          | Yes                                                                      |
| 133                  | 0                                                          | 109                                   | 271                                | 0.3                                                            | 37.0                                                   | 2.4                                                          | 316.9                                                | Low                               | 10                                |                                          | No                                                                       |

‡ censored days in parenthesis

Note: Patient 108 and 117 were TKI-naïve but have withdrawn from the study during their treatment, hence not included in the prognosis analysis.

#### Appendix Table S4. Survival, mutational and tumor volume data of 19 TKI-naïve patients with available pre-treatment cfDNA samples

Survival data of 19 TKI-naïve patients who had cfDNA detected in first available plasma before treatment initiation. CfDNA levels in first plasma samples were estimated based on EGFR activating mutations as mutant allele fractions (MAF) and copies/ml plasma respectively in columns 4 and 5. When multiple mutations were present, cfDNA levels were estimated based on the most abundant mutations (i.e. where MAF or copies/ml plasma were highest) in columns 6 and 7, respectively. Mutation levels were classified as low, intermediate and high based on below 25% quartile, intermediate and above 75% quartile. Clinical information about the tumors such as RECIST measurements, median volume and the presence of extra-thoracic disease were shown.

| Patient study number                                                                     | Detection of EGFR T790M in plasma |                                                   |                                                         | Time to events in days (censored days in parenthesis) |          |
|------------------------------------------------------------------------------------------|-----------------------------------|---------------------------------------------------|---------------------------------------------------------|-------------------------------------------------------|----------|
|                                                                                          | Maximal AF during treatment (%)   | Time from start of treatment to detection (days)# | Lead time from detection to disease progression (days)# | Progression                                           | Survival |
| <b>TKI-naïve</b>                                                                         |                                   |                                                   |                                                         |                                                       |          |
| 6                                                                                        | ND                                |                                                   |                                                         | 343                                                   | 785      |
| 8                                                                                        | 0.18                              | 70                                                | 636                                                     | 706                                                   | 1213     |
| 10                                                                                       | ND                                |                                                   |                                                         | 174                                                   | 293      |
| 12                                                                                       | 0.6                               | 18 days before start of treatment                 | 417                                                     | 399                                                   | 565      |
| 101                                                                                      | 6.22                              | 873                                               | 280                                                     | 1153                                                  | 1439     |
| 103                                                                                      | 4.66                              | 189                                               | 111                                                     | 285                                                   | 821      |
| 104                                                                                      | ND                                |                                                   |                                                         | 117                                                   | 119      |
| 105                                                                                      | ND                                |                                                   |                                                         | 342                                                   | 1637     |
| 106                                                                                      | 0.31                              | 454                                               | 392                                                     | 483                                                   | 1085     |
| 107                                                                                      | ND                                |                                                   |                                                         | 140                                                   | 159      |
| 109                                                                                      | 0.18                              | 35                                                | 167                                                     | 196                                                   | 374      |
| 112                                                                                      | ND                                |                                                   |                                                         | 342                                                   | 785      |
| 113                                                                                      | 0.64                              | 545                                               | 918                                                     | 1335                                                  | 1532     |
| 115                                                                                      | ND                                |                                                   |                                                         | 173                                                   | 288      |
| 116                                                                                      | 0.46                              | 35                                                | 254                                                     | 285                                                   | 555      |
| 119                                                                                      | ND                                |                                                   |                                                         | 287                                                   | 394      |
| 120                                                                                      | 3.98                              | 203                                               | 72                                                      | 288                                                   | 446      |
| 122                                                                                      | 0.61                              | 37                                                | 421                                                     | 458                                                   | 1255     |
| 123                                                                                      | ND                                |                                                   |                                                         | 230                                                   | 528      |
| 124                                                                                      | ND                                |                                                   |                                                         | 216                                                   | 289      |
| 125                                                                                      | 1.77                              | 230                                               | 203                                                     | 433                                                   | 497      |
| 126                                                                                      | 2.47                              | 202                                               | 146                                                     | 348                                                   | 640      |
| 127                                                                                      | 0.75                              | 119                                               | 55                                                      | 174                                                   | 456      |
| 128                                                                                      | ND                                |                                                   |                                                         | 399                                                   | 860      |
| 130                                                                                      | ND                                |                                                   |                                                         | 234                                                   | 387      |
| 131                                                                                      | 1.56                              | 265                                               | 50                                                      | 370                                                   | 977      |
| 133                                                                                      | 0.81                              | 90                                                | 19                                                      | 109                                                   | 257      |
| 134                                                                                      | 0.42                              | 92                                                | 84                                                      | 176                                                   | 374      |
| 135                                                                                      | ND                                |                                                   |                                                         | 175                                                   | 227      |
| * AF = Allele Fraction<br>#Number in parenthesis are right-censored<br>ND = Not Detected |                                   |                                                   |                                                         |                                                       |          |

Note: Patient 108 and 117 were TKI-naïve but have withdrawn from the study during their treatment, hence not included in the prognosis analysis.

## Appendix Table S5. Detection of T790M in plasma samples and relationship with prognosis

Table summarising whether *EGFR* T790M was detected in any plasma samples during treatment, and if detected, the days of detection from start of treatment and from time of onset of disease progression, respectively, were shown. The survival data were shown as time to events in days (progression or overall survival).

| Assays              | Poisson-corrected copy number of mutant DNA | Poisson-corrected copy number of wild type DNA | False positive rate |
|---------------------|---------------------------------------------|------------------------------------------------|---------------------|
| EGFR Ex 19 deletion | 0                                           | 577                                            |                     |
| EGFR Ex 19 deletion | 0                                           | 2416                                           |                     |
| EGFR Ex 19 deletion | 0                                           | 114                                            |                     |
| EGFR Ex 19 deletion | 0                                           | 103                                            |                     |
| EGFR Ex 19 deletion | 0                                           | 481                                            |                     |
| EGFR Ex 19 deletion | 0                                           | 448                                            |                     |
| EGFR Ex 19 deletion | 0                                           | 536                                            |                     |
| EGFR Ex 19 deletion | 0                                           | 461                                            |                     |
| EGFR Ex 19 deletion | 0                                           | 244                                            |                     |
| EGFR Ex 19 deletion | 0                                           | 272                                            |                     |
| EGFR Ex 19 deletion | 0                                           | 278                                            |                     |
| EGFR Ex 19 deletion | 0                                           | 258                                            |                     |
| EGFR Ex 19 deletion | 0                                           | 495                                            |                     |
| EGFR Ex 19 deletion | 0                                           | 468                                            |                     |
| EGFR Ex 19 deletion | 0                                           | 394                                            |                     |
| EGFR Ex 19 deletion | 0                                           | 427                                            |                     |
| EGFR Ex 19 deletion | 0                                           | 454                                            |                     |
| EGFR Ex 19 deletion | 0                                           | 506                                            |                     |
| EGFR Ex 19 deletion | 0                                           | 540                                            |                     |
| EGFR Ex 19 deletion | 0                                           | 605                                            |                     |
| Total               | 0                                           | 10077                                          | 0.00%               |

  

|            |   |      |       |
|------------|---|------|-------|
| EGFR L858R | 0 | 457  |       |
| EGFR L858R | 0 | 360  |       |
| EGFR L858R | 1 | 386  |       |
| EGFR L858R | 0 | 635  |       |
| EGFR L858R | 0 | 550  |       |
| EGFR L858R | 0 | 434  |       |
| EGFR L858R | 0 | 628  |       |
| EGFR L858R | 0 | 550  |       |
| EGFR L858R | 0 | 299  |       |
| EGFR L858R | 0 | 198  |       |
| EGFR L858R | 1 | 157  |       |
| EGFR L858R | 0 | 386  |       |
| EGFR L858R | 0 | 357  |       |
| EGFR L858R | 0 | 366  |       |
| EGFR L858R | 0 | 508  |       |
| EGFR L858R | 0 | 514  |       |
| EGFR L858R | 0 | 107  |       |
| EGFR L858R | 0 | 110  |       |
| EGFR L858R | 0 | 105  |       |
| EGFR L858R | 0 | 117  |       |
| EGFR L858R | 0 | 608  |       |
| EGFR L858R | 0 | 487  |       |
| EGFR L858R | 0 | 195  |       |
| EGFR L858R | 1 | 168  |       |
| EGFR L858R | 0 | 278  |       |
| EGFR L858R | 0 | 296  |       |
| EGFR L858R | 0 | 128  |       |
| EGFR L858R | 0 | 141  |       |
| Total      | 3 | 9525 | 0.03% |

  

|            |   |       |       |
|------------|---|-------|-------|
| EGFR T790M | 0 | 55    |       |
| EGFR T790M | 0 | 89    |       |
| EGFR T790M | 0 | 45    |       |
| EGFR T790M | 0 | 60    |       |
| EGFR T790M | 0 | 170   |       |
| EGFR T790M | 0 | 156   |       |
| EGFR T790M | 0 | 139   |       |
| EGFR T790M | 0 | 168   |       |
| EGFR T790M | 0 | 119   |       |
| EGFR T790M | 0 | 95    |       |
| EGFR T790M | 0 | 103   |       |
| EGFR T790M | 0 | 114   |       |
| EGFR T790M | 0 | 132   |       |
| EGFR T790M | 0 | 82    |       |
| EGFR T790M | 0 | 5104  |       |
| EGFR T790M | 0 | 233   |       |
| EGFR T790M | 0 | 579   |       |
| EGFR T790M | 0 | 127   |       |
| EGFR T790M | 0 | 94    |       |
| EGFR T790M | 0 | 91    |       |
| EGFR T790M | 0 | 91    |       |
| EGFR T790M | 0 | 78    |       |
| EGFR T790M | 0 | 489   |       |
| EGFR T790M | 0 | 481   |       |
| EGFR T790M | 0 | 158   |       |
| EGFR T790M | 0 | 113   |       |
| EGFR T790M | 0 | 143   |       |
| EGFR T790M | 0 | 102   |       |
| EGFR T790M | 0 | 119   |       |
| EGFR T790M | 0 | 105   |       |
| EGFR T790M | 0 | 81    |       |
| EGFR T790M | 0 | 72    |       |
| EGFR T790M | 0 | 76    |       |
| EGFR T790M | 0 | 24    |       |
| EGFR T790M | 0 | 35    |       |
| EGFR T790M | 0 | 126   |       |
| EGFR T790M | 0 | 60    |       |
| EGFR T790M | 0 | 66    |       |
| EGFR T790M | 0 | 70    |       |
| EGFR T790M | 0 | 79    |       |
| EGFR T790M | 0 | 73    |       |
| EGFR T790M | 0 | 21    |       |
| Total      | 0 | 10417 | 0.00% |

## Appendix Table S6. Specificity of the digital PCR assays

The specificity of digital PCR assays for Exon 19 deletion, L858R and T790M were tested in healthy plasma samples. No positive detection of mutant allele was seen for the Exon 19 deletion and T790M assay in >10,000 wild-type DNA molecules. For L858R, 3 false positive detections were observed out of ~9500 wild-type DNA molecules, giving a false positive rate of 0.03%.

| Gene  | Protein change  | Mutation position      | Mutation details      | Amplicon position       | Forward primer          | Reverse primer           | Amplicon length |
|-------|-----------------|------------------------|-----------------------|-------------------------|-------------------------|--------------------------|-----------------|
| EGFR  | p.L744_E749>LKR | chr7:55242460-55242477 | 15bp inframe deletion | chr7:55242438-55242541  | GAAAGTTAAATTCCTCGCTAT   | ACCCCCACAGCAAAGC         | 104bp           |
| EGFR  | p.L858R         | chr7:55259515          | T>G                   | chr7:55259484-55259561  | CCGCAGCATGTCAAGATCAC    | TCCTTCTGCATGGTATTCTTCTCT | 78bp            |
| EGFR  | p.T790M         | chr7:55249071          | C>T                   | chr7:55249038-55249122  | GCATCTGCCTCACCTCCA      | TCTTTGTGTTCCCGACATAG     | 85bp            |
| RPP30 | -               | -                      | -                     | chr10:92631758-92631822 | AGATTTGGACCTGCGAGCG     | GAGCGGCTGTCTCCACAAGT     | 65bp            |
| Gene  | Protein change  | Mutation position      | Mutation details      | Probe (Mutant)          | Probe (Wild-type)       | Tm                       |                 |
| EGFR  | p.L744_E749>LKR | chr7:55242460-55242477 | 15bp inframe deletion | ACATCGAGGATTCCTTGT      | AATTAAAGAAGCAACATC      | 55C                      |                 |
| EGFR  | p.L858R         | chr7:55259515          | T>G                   | TTGGCCCGCCCAA           | TTGGCCAGCCCAA           | 56C                      |                 |
| EGFR  | p.T790M         | chr7:55249071          | C>T                   | TCATCATGCAGCTCAT        | TCATCACGCAGCTCA         | 60C                      |                 |
| RPP30 | -               | -                      | -                     | -                       | TTCTGACCTGAAGGCTCTGCGCG | 60C                      |                 |

## Appendix Table S7. Primer and probe sequences of digital PCR assays

Table summarizing the primer and probe sequences of digital PCR assays for *EGFR* Exon 19 deletion, L858R and T790M mutations, as well as for the *RPP30* gene.

## References:

Forshe T, Murtaza M, Parkinson C, Gale D, Tsui DW, Kaper F, Dawson SJ, Piskorz AM, Jimenez-Linan M, Bentley D, Hadfield J, May AP, Caldas C, Brenton JD, Rosenfeld N (2012) Noninvasive identification and monitoring of cancer mutations by targeted deep sequencing of plasma DNA. *Sci Transl Med* 4: 136ra168

Vogelstein B, Kinzler KW (1999) Digital PCR. *Proc Natl Acad Sci U S A* 96: 9236-9241

Wang J, Ramakrishnan R, Tang Z, Fan W, Kluge A, Dowlati A, Jones RC, Ma PC (2010) Quantifying EGFR alterations in the lung cancer genome with nanofluidic digital PCR arrays. *Clin Chem* 56: 623-632

Yung TK, Chan KC, Mok TS, Tong J, To KF, Lo YM (2009) Single-molecule detection of epidermal growth factor receptor mutations in plasma by microfluidics digital PCR in non-small cell lung cancer patients. *Clin Cancer Res* 15: 2076-2084
